# Supplementary material for: Precision identification of high-risk phenotypes and progression pathways in severe malaria without requiring longitudinal data
Source: PubMed Central journal article supplement (PMC6620311; doi:10.1038/s41746-019-0140-y), 2019-07-10
Supplement: 41746_2019_140_MOESM1_ESM.pdf [file 41746_2019_140_MOESM1_ESM.pdf]

Supplementary Materials

**Precision identification of high-risk phenotypes and progression pathways in severe malaria without requiring longitudinal data**

Iain G. Johnston, Till Hoffmann, Sam F. Greenbury, Ornella Cominetti, Muminatou Jallow, Dominic Kwiatkowski, Mauricio Barahona, Nick S. Jones and Climent Casals-Pascual

Supplementary Table 1.  
Supplementary Figure S1.

| Feature     | Coding                                                                                | Definition                                                                                | Missing |
|-------------|---------------------------------------------------------------------------------------|-------------------------------------------------------------------------------------------|---------|
| cough       | binary                                                                                | Coughing                                                                                  | 2.61%   |
| hbtotal     | numeric                                                                               | Haemoglobin on admission derived from HB and PCV (g/dL)                                   | 2.13%   |
| totalbcs    | ordinal                                                                               | Total coma score on admission                                                             | 0.17%   |
| deepbr      | binary                                                                                | Deep breathing                                                                            | 64.77%  |
| agemth      | numeric                                                                               | Age in months                                                                             | 0.38%   |
| convuls     | binary                                                                                | Reported convulsions prior to admission                                                   | 5.45%   |
| coma        | binary                                                                                | Coma                                                                                      | 3.33%   |
| comatime    | numeric                                                                               | Duration of coma in hours                                                                 | 49.71%  |
| diarea      | binary                                                                                | Diarrhea                                                                                  | 2.30%   |
| vomit       | binary                                                                                | Vomiting                                                                                  | 2.06%   |
| usleepy     | binary                                                                                | Unusually sleepy                                                                          | 1.75%   |
| irit        | binary                                                                                | Restless or irritable                                                                     | 4.22%   |
| dbreth      | binary                                                                                | Breathing difficulty                                                                      | 2.81%   |
| letagy      | binary                                                                                | Lethargy                                                                                  | 4.05%   |
| rfeed       | binary                                                                                | Reduced feeding                                                                           | 2.30%   |
| pallor      | 1 - conjunctiva,<br>2 - palms,<br>3 - tongue, 4 - all                                 | Pallor (pale appearance)                                                                  | 32.08%  |
| jaundice    | binary                                                                                | Jaundice (yellowing of the skin)                                                          | 2.16%   |
| grunt       | binary                                                                                | Grunting                                                                                  | 2.54%   |
| acmuscle    | binary                                                                                | Use of accessory muscles of respiration                                                   | 2.26%   |
| dehyd       | 0 - not assessed, 1 -<br>nil, 2 - mild,<br>3 - moderate,<br>4 - severe                | Dehydration                                                                               | 21.17%  |
| temp        | numeric                                                                               | Temperature (C)                                                                           | 1.10%   |
| hrate       | numeric                                                                               | Heart rate (bpm)                                                                          | 0.31%   |
| sao         | numeric                                                                               | Oxygen saturation                                                                         | 66.07%  |
| resprate    | numeric                                                                               | Respiratory rate (#/min)                                                                  | 0.51%   |
| spleen      | numeric                                                                               | Spleen size (cm)                                                                          | 1.23%   |
| liver       | numeric                                                                               | Liver size (cm)                                                                           | 1.23%   |
| rfail       | binary                                                                                | Renal (kidney) failure                                                                    | 5.93%   |
| poedema     | binary                                                                                | Pulmonary oedema                                                                          | 5.93%   |
| posture     | 0 - not assessed,<br>1 - Yes, 2 - No                                                  | Abnormal posturing                                                                        | 22.33%  |
| prostrat    | 0 - not assessed,<br>1 - Yes, 2 - No                                                  | Prostration (extreme weakness)                                                            | 23.26%  |
| nofseizs    | numeric                                                                               | Number of seizures                                                                        | 40.51%  |
| waz         | numeric                                                                               | Weight z-score controlling for age                                                        | 29.43%  |
| convadm     | binary                                                                                | Convulsions during admission                                                              | 65.42%  |
| itrecess    | binary                                                                                | Intercostal recession                                                                     | 70.46%  |
| hypogl      | binary                                                                                | Hypoglycemia (glucose deficiency)                                                         | 29.95%  |
| parmc1      | numeric                                                                               | Parasite count (#/ $\mu$ L)                                                               | 2.09%   |
| death       | binary                                                                                | Death                                                                                     | 0.38%   |
| cluster_idx | categorical                                                                           | Cluster as inferred by the networks method                                                | 0.00%   |
| who_type    | 1=CM, 2=CMRD,<br>3=RD, 4=<br>CMSMA,<br>5=CMRDSMA,<br>6=RDSMA,<br>7=SMA and<br>8=other | Malarial type (CM=cerebral malaria, RD=respiratory distress, SMA=severe malarial anaemia) | 0.00%   |

Supplementary Table 1. List of clinical features analysed.

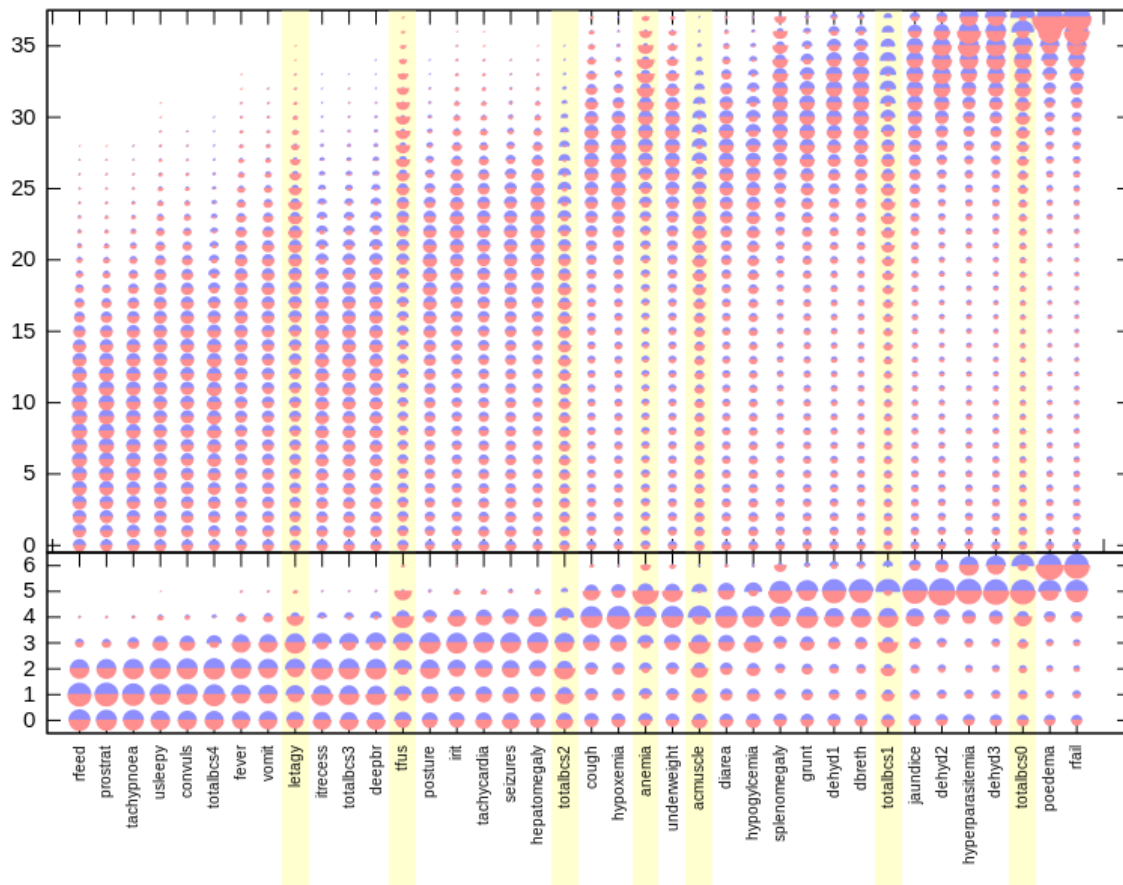

Supplementary Figure S1. **HyperTraPS inference of malarial disease progression with transfusion included as a feature.** As in Fig 2A, the HyperTraPS algorithm (see text) was used to infer the ordering with which malarial symptoms are likely acquired across patients. Unlike Fig 2A, blood transfusion (“tfus”) is here included as a disease feature, despite its interventional nature. Horizontal axis records symptoms; vertical axis records ordering from low (early acquisition) to high (late acquisition). This ordering axis is grouped into 6 longer “ordering windows” in the lower subsection of the figure, to display broader trends in addition to specific features of the dynamics. The size of a semicircle denotes the posterior probability that a given symptom is acquired at a given ordering in progression of malaria. Red semicircles are posteriors from the dataset of patients who died; blue semicircles inferred from patients who lived. Highlighted symptoms display a greater KS distance between posteriors from survival and death pathways than between either posterior and the uninformative prior. The inferred ordering of symptom acquisitions is almost identical to the case when transfusion is omitted, and the transfusion “symptom” appears as a strong predictor of survival.
